# Supplementary material
Source: HighWire-hosted journal article supplement (http://molpharm.aspetjournals.org/highwire/filestream/77250/field_highwire_adjunct_files/4/supl_data_resubmission_90183.pdf)
Supplement: supl_data_resubmission_90183.pdf [file supl_data_resubmission_90183.pdf]

**Structure, molecular modeling and function of the first potassium channel blocker, urotoxin, isolated from the venom of the Australian scorpion *Urodacus yaschenkoi*.** Karen Luna-Ramírez, Adam Bartok, Rita Restano-Cassulini, Veronica Quintero-Hernández, Fredy I.V. Coronas, Janni Christensen, Christine E. Wright, Gyorgy Panyi and Lourival D. Possani. *Molecular Pharmacology*

## 15. Supplemental Data

```

1/1                               31/11                               61/21
atg aat gca aag ctc atc tac ctt ctg ctt gtg gtc acc acc atg atg ctg acg ttt gat aca aca
M N A K L I Y L L L V V T T M M L T F D T T
-----
cag gcc gga gat atc aag tgc tca          91/31          aga cag tgc tgg ggc ccc tgc aaa          121/41
Q A G D I K C S G T R Q C W G P C K K Q T T
-----
tgt acc aat tca aaa tgc atg aac          151/51          gga aag tgc aaa tgt tat ggc tgt gta gga taa aat atg ttt
C T N S K C M N G K C K C Y G C V G *
-----
gtc tga gag tta          211/71          att ttg aaa agt aaa atg aaa caa aat ttt          241/81          cta tta aca ata gaa taa tca tgg
-----
cgt tat          271/91          gaa tta ttg gta tat tag atg aac tgt tta agt taa aaa ata aga ata aca ata ctt tga
-----
331/111                               361/121                               391/131
aaa tga tct tct cga ata ctt taa cat gtg ctg atg taa caa tta tac cat tcg tta cca ata aag
cca gt

```

**Supplemental Figure 1.** Sequence of DNA encoding urotoxin and its translation.

The DNA sequencing of urotoxin was obtained as described in Materials and Methods. The sequence of DNA encoding urotoxin and its translation are represented with the following individual components, corresponding to the open reading frame: signal peptide (underlined), mature peptide corresponding to urotoxin (amino acids in bold), amino acid involved in post-translational modification (amidation): G62 (Bold and underlined), stop codon (asterisk), 3'-UTR (italics). The nucleotide sequence of urotoxin reported in this paper has been submitted to GenBank under the accession number: KC818423.

**Structure, molecular modeling and function of the first potassium channel blocker, urotoxin, isolated from the venom of the Australian scorpion *Urodacus yaschenkoi*.** Karen Luna-Ramírez, Adam Bartok, Rita Restano-Cassulini, Veronica Quintero-Hernández, Fredy I.V. Coronas, Janni Christensen, Christine E. Wright, Gyorgy Panyi and Lourival D. Possani. *Molecular Pharmacology*

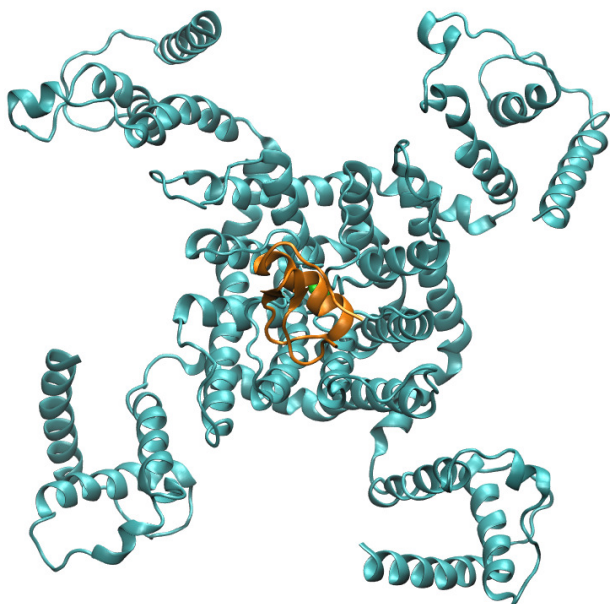

**Supplemental Figure 2.** Bound state of urotoxin with hKv 1.2. Position of the toxin when forming one of the most recurring bound states.

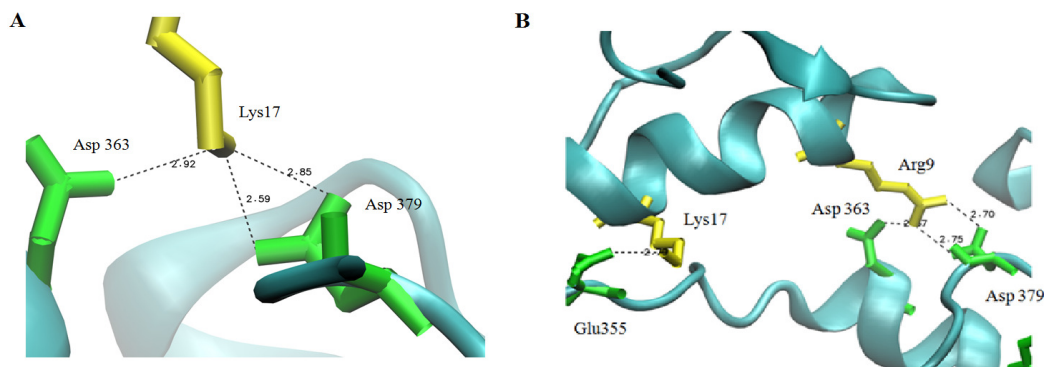

**Supplemental Figure 3.** Bound states of urotoxin and hKv1.2. (A) Lys17 is forming an H-network with Asp363 and Asp379. (B) Lys17-Glu355 are forming an H-bond occluding the ion conduction and, at the same time on the other side of urotoxin's  $\alpha$ -helix, Arg9 forms an H-network with Asp363 and Asp379.

**Structure, molecular modeling and function of the first potassium channel blocker, urotoxin, isolated from the venom of the Australian scorpion *Urodacus yaschenkoi*.** Karen Luna-Ramírez, Adam Bartok, Rita Restano-Cassulini, Veronica Quintero-Hernández, Fredy I.V. Coronas, Janni Christensen, Christine E. Wright, Gyorgy Panyi and Lourival D. Possani. *Molecular Pharmacology*

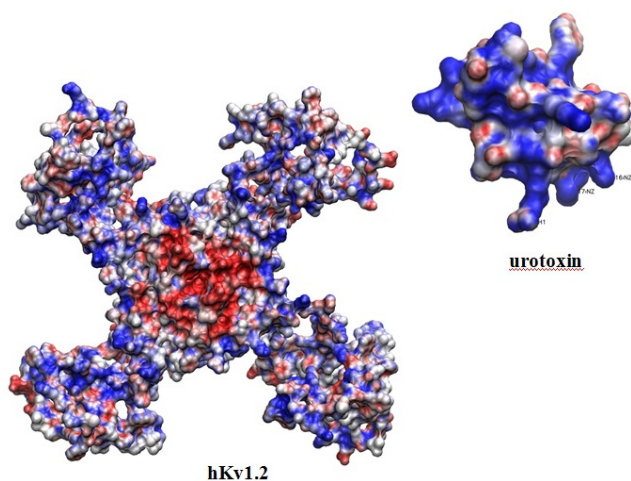

**Supplemental Figure 4.** Electrostatic surfaces of the human Kv1.2 channel and urotoxin. The negatively charged pore region of hKv1.2 (red) and the positively charged surface of urotoxin (blue) facilitates their interaction.

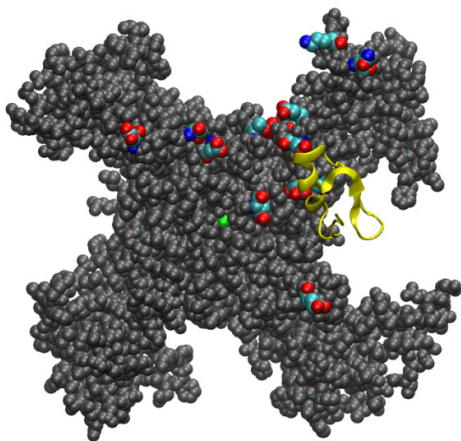

**Supplemental Figure 5.** Average position of urotoxin with respect to hKv1.1 during the MD simulation. Urotoxin in yellow is positioned close to the turret region (or far away from the pore, compare to the urotoxin-Kv1.2 complex in Fig. 9). The channel is in grey. Highlighted (in color) are the most active residues forming H-bonds and salt bridges during the 500 ns simulation.

**Structure, molecular modeling and function of the first potassium channel blocker, urotoxin, isolated from the venom of the Australian scorpion *Urodacus yaschenkoi*.** Karen Luna-Ramírez, Adam Bartok, Rita Restano-Cassulini, Veronica Quintero-Hernández, Fredy I.V. Coronas, Janni Christensen, Christine E. Wright, Gyorgy Panyi and Lourival D. Possani. *Molecular Pharmacology*

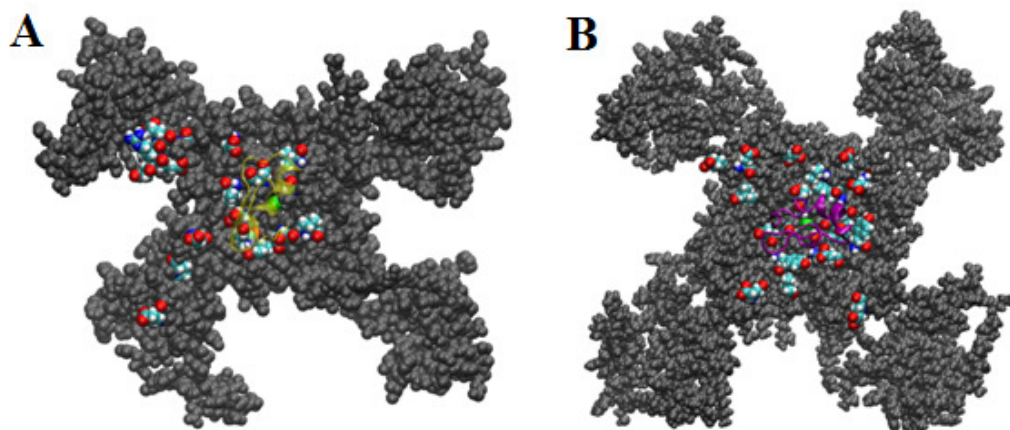

**Supplemental Figure 6.** MD with a mutant-urotoxin. **(A)** K25A-urotoxin with hKv1.2 channel. Average position of the mutant toxin throughout the simulation. The image shows how the toxin (in light yellow) is positioned above the pore suggesting the binding is stronger without K25. Highlighted in color are the most active residues forming H-bonds and salt bridges during the whole simulation. **(B)** K25A-urotoxin with hKv1.1 channel. Average position of mutant toxin (in purple) throughout the simulation. The toxin is above the pore and the residues highlighted in color are the most active in forming H-bonds and salt bridges.

**Structure, molecular modeling and function of the first potassium channel blocker, urotoxin, isolated from the venom of the Australian scorpion *Urodacus yaschenkoi*.** Karen Luna-Ramírez, Adam Bartok, Rita Restano-Cassulini, Veronica Quintero-Hernández, Fredy I.V. Coronas, Janni Christensen, Christine E. Wright, Gyorgy Panyi and Lourival D. Possani. *Molecular Pharmacology*

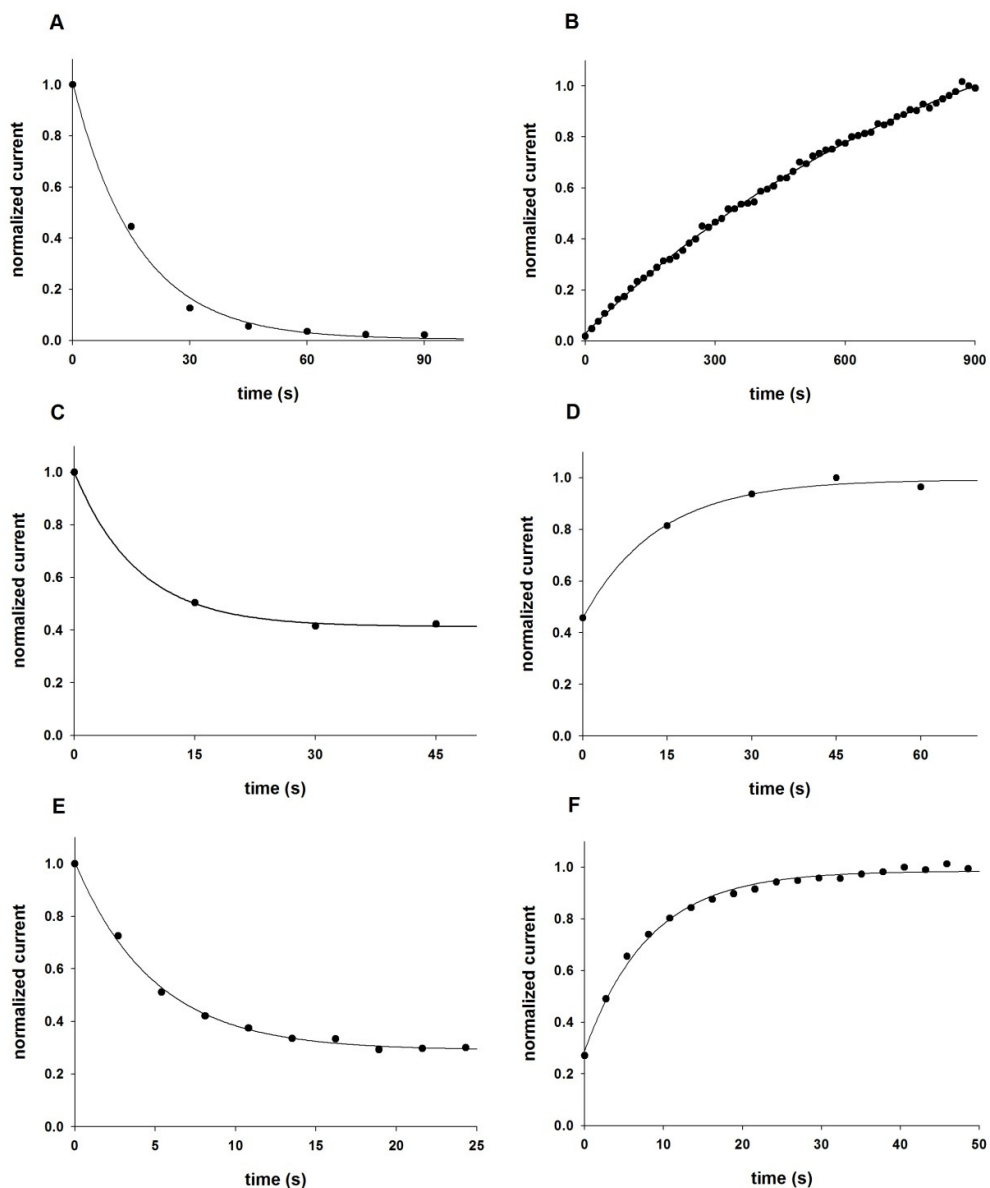

**Supplemental Figure 7.** Peak currents of hKv1.2 (A,B), KCa3.1 (C,D) and hKv1.1 (E,F) were recorded during the wash-in (A,C,E) and wash-out (B,D,F) procedure. To determine the time constant of the association a single exponential function was fitted to the data points:  $A(t) = B \times \exp(-t/T_{ON}) + C$ , where  $A(t)$  indicates the amplitude of the current at time  $t$ ,  $C$  is the peak current at equilibrium block and  $B = A(t = 0) - C$ . The time constant ( $T_{ON}$ ) yielded  $18.6 \pm 1.2$  s at 10 nM urotoxin for hKv1.2,  $7.9 \pm 3.7$  s, ( $n = 3$ ) at 30 nM urotoxin for hKv1.3 and  $5.7 \pm 0.8$  s, ( $N = 4$ ) at 1  $\mu$ M

**Structure, molecular modeling and function of the first potassium channel blocker, urotoxin, isolated from the venom of the Australian scorpion *Urodacus yaschenkoi*.** Karen Luna-Ramírez, Adam Bartok, Rita Restano-Cassulini, Veronica Quintero-Hernández, Fredy I.V. Coronas, Janni Christensen, Christine E. Wright, Gyorgy Panyi and Lourival D. Possani. *Molecular Pharmacology*

urotoxin for hKv1.1. The wash-out kinetics was also fitted using a single exponential function:  $A(t) = B \times (1 - \exp(-t/T_{OFF})) + C$ , where  $B = A(t = \infty) - C$ ,  $A(t)$  indicates the amplitude of the measured current at time  $t$ ,  $C$  is the peak current at equilibrium block. The resulting time constants ( $T_{OFF}$ ) were  $958.6 \pm 68.1$  s ( $n = 4$ ),  $14.4 \pm 0.6$  s ( $n = 3$ ) and  $8.1 \pm 0.5$  s ( $n = 4$ ) for hKv1.2, hKCa3.2 and hKv1.1, respectively.

**Structure, molecular modeling and function of the first potassium channel blocker, urotoxin, isolated from the venom of the Australian scorpion *Urodacus yaschenkoi*.** Karen Luna-Ramírez, Adam Bartok, Rita Restano-Cassulini, Veronica Quintero-Hernández, Fredy I.V. Coronas, Janni Christensen, Christine E. Wright, Gyorgy Panyi and Lourival D. Possani. Molecular Pharmacology

**Supplemental Table 1.** Residues forming **H-bond** during the 500 ns brute force simulation for the urotoxin-**hKv1.2** channel complex. Chains A, B, C and D belong to the channel while urotoxin is channel F. Atoms NHx or ODx form the H-bonds. Bold letters indicate residues in the pore region of the channel.

|                     |                    |                     |                              |                      |
|---------------------|--------------------|---------------------|------------------------------|----------------------|
| Farg9NH2_Dglu353OE1 | Farg9NH2_Dser356OG | Fgln10NZ_Basp379OD1 | Flys16NZ_Basp <b>363</b> OD1 | Flys16NZ_Dgln357OD1  |
| Farg9NH2_Dglu353OE2 |                    | Fgln10NZ_Basp379OD2 | Flys16NZ_Basp <b>363</b> OD2 |                      |
|                     | Flys16NZ_Dser356OG |                     |                              | Flys32NZ_Bglu357OE1  |
| Flys16NZ_Dglu353OE1 |                    | Flys16NZ_Basp379OD2 | Flys17NZ_Basp <b>363</b> OD1 |                      |
| Flys16NZ_Dglu353OE2 |                    |                     | Flys17NZ_Basp <b>363</b> OD2 | Fthr20OG1_Bgln357NE2 |
|                     |                    | Flys4NZ_Dasp379OE1  |                              | Fthr20OG1_Bgln357NE2 |
| Flys25NZ_Dglu353OE1 |                    | Flys4NZ_Dasp379OE2  |                              |                      |
| Flys25NZ_Dglu353OE2 |                    |                     |                              |                      |
|                     |                    | Flys16NZ_Basp379OD1 |                              |                      |
|                     |                    |                     |                              |                      |
|                     |                    | Flys17NZ_Dasp379OD1 |                              |                      |
|                     |                    | Flys17NZ_Dasp379OD2 |                              |                      |

**Supplemental Table 2.** Residues forming **salt bridges** during the 500 ns brute force simulation for the **hKv1.2**-urotoxin channel complex. Chains A, B, C and D belong to the channel while urotoxin is channel F. Bold letters indicate residues in the pore region of the channel.

|                |                       |                |                |                |
|----------------|-----------------------|----------------|----------------|----------------|
| Asp352A_lys16F | <b>asp363B_arg9F</b>  | asp379A_arg9F  | glu353A_lys16F | glu355A_arg9F  |
|                | <b>asp363B_lys16F</b> |                | glu353A_lys32F | glu355A_lys4F  |
|                | <b>asp363B_lys17F</b> | asp379B_arg9F  |                | glu355A_lys16F |
|                |                       | asp379B_lys4F  | glu353D_arg9F  | glu355A_lys17F |
|                | <b>asp363C_lys16F</b> | asp379B_lys16F | glu353D_lys16F | glu355A_lys25  |
|                | <b>asp363C_lys17F</b> | asp379B_lys17F | glu353D_lys25F |                |
|                |                       | asp379B_lys30F |                | glu355B_lys16F |
|                | <b>asp363D_lys17F</b> |                |                | glu355B_lys17F |
|                |                       | asp379D_arg9F  |                | glu355B_lys32F |
|                |                       | asp379D_lys4F  |                |                |
|                |                       | asp379D_lys17F |                | glu355D_arg9F  |

**Structure, molecular modeling and function of the first potassium channel blocker, urotoxin, isolated from the venom of the Australian scorpion *Urodacus yaschenkoi*.** Karen Luna-Ramírez, Adam Bartok, Rita Restano-Cassulini, Veronica Quintero-Hernández, Fredy I.V. Coronas, Janni Christensen, Christine E. Wright, Gyorgy Panyi and Lourival D. Possani. *Molecular Pharmacology*

**Supplemental Table 3.** Residues forming **H-bond** during the 500 ns brute force simulation for the urotoxin-**hKv1.1** channel complex. Chains A, B, C and D belong to the channel while urotoxin is channel F. Atoms (NHx or ODx) form the H-bonds. Red residues indicate residues in the selectivity filter region of the channel.

---

|                     |                      |                     |                          |                  |
|---------------------|----------------------|---------------------|--------------------------|------------------|
| C377AspOD1_F25LysNZ | B351GluOE1_F28AsnND2 | B353GluOE1_F30LysNZ | <b>C375TyrO_F9ArgNH2</b> | D379Tyr_F9ArgNH1 |
| C377AspOD2_F25LysNZ | B351GluOE2_F28AsnND2 | B353GluOE2_F30LysNZ |                          |                  |
| B377AspOD1_F25LysNZ |                      |                     |                          |                  |
| B377AspOD2_F25LysNZ |                      |                     |                          |                  |
| D377AspOD1_F9ArgNH1 |                      |                     |                          |                  |
| D377AspOD2_F9ArgNH1 |                      |                     |                          |                  |

---

**Supplemental Table 4.** Residues forming **salt bridges** during the 500 ns brute force simulation for the **urotoxin-hKv1.1** channel complex. Chains A, B, C and D belong to the channel while urotoxin is channel F. Bold letters indicate residues in the pore region of the channel.

---

|                |                |                |                       |
|----------------|----------------|----------------|-----------------------|
| B377Asp_F25Lys | BGlu353_F30Lys | B351GLu_F30Lys | <b>A361Asp_F9Arg</b>  |
| C377Asp_F25Lys |                |                |                       |
|                | B353Glu_F32Lys | C351Glu_F9Arg  | <b>C361Asp_F25Lys</b> |
| A377Asp_F4Lys  |                |                |                       |
| B377Asp_F4Lys  | A353Glu_F16Lys | C351Glu_F25Lys |                       |
|                |                |                |                       |
| B377Asp_F30Lys | C353Glu_F9Arg  |                |                       |
|                |                |                |                       |
| D377Asp_F9Arg  |                |                |                       |

---
